# Supplementary material
Source: HighWire-hosted journal article supplement (https://www.cmajopen.ca/highwire/filestream/80824/field_highwire_adjunct_files/0/open-2014-0018-1-at.pdf)
Supplement: open-2014-0018-1-at.pdf [file open-2014-0018-1-at.pdf]

**Appendix 1 (as supplied by author): Results of univariable and multivariable analyses of risk factors associated with all-cause, in-hospital and 90-day postdischarge mortality**

Supplementary Table 1: Univariable analyses of risk factors contributing to all-cause, in-hospital, and 90-day postdischarge mortality among 925 patients with *Staphylococcus aureus* bacteremia between 2008 and 2012.

| Variable                                      | All-cause Mortality |         | In-hospital Mortality |         | Postdischarge Mortality |         |
|-----------------------------------------------|---------------------|---------|-----------------------|---------|-------------------------|---------|
|                                               | OR (95% CI)         | P value | OR (95% CI)           | P value | OR (95% CI)             | P value |
| Age (decades)                                 | 1.38 (1.27 - 1.50)  | <0.0001 | 1.43 (1.30 - 1.57)    | <0.0001 | 1.17 (1.02 - 1.36)      | 0.031   |
| Male gender                                   | 0.99 (0.74 - 1.33)  | 0.97    | 1.025 (0.75 - 1.40)   | 0.88    | 0.91 (0.53 - 1.56)      | 0.74    |
| Injection drug use                            | 0.39 (0.25 - 0.60)  | <0.0001 | 0.385 (0.24 - 0.63)   | <0.0001 | 0.46 (0.21 - 1.04)      | 0.063   |
| Methicillin resistance                        | 1.60 (1.21 - 2.13)  | 0.0011  | 1.40 (1.03 - 1.90)    | 0.031   | 2.09 (1.24 - 3.53)      | 0.0060  |
| Sepsis                                        | 1.61 (1.17 - 2.22)  | 0.0032  | 1.66 (1.17 - 2.36)    | 0.0043  | 1.34 (0.75 - 2.39)      | 0.33    |
| Pneumonia                                     | 1.69 (1.12 - 2.54)  | 0.012   | 1.83 (1.19 - 2.80)    | 0.010   | 1.19 (0.52 - 2.73)      | 0.68    |
| Skin/soft tissue infection                    | 0.59 (0.40 - 0.86)  | 0.0071  | 0.57 (0.37 - 0.88)    | 0.010   | 0.71 (0.35 - 1.43)      | 0.34    |
| Admission to the intensive care unit          | 3.71 (2.70 - 5.08)  | <0.0001 | 4.44 (3.20 - 6.16)    | <0.0001 | 1.53 (0.82 - 2.89)      | 0.19    |
| Coronary artery disease                       | 1.27 (0.89 - 1.82)  | 0.18    | 1.37 (0.94 - 2.00)    | 0.10    | 0.98 (0.48 - 1.98)      | 0.95    |
| Congestive heart failure                      | 1.18 (0.73 - 1.93)  | 0.50    | 1.07 (0.63 - 1.83)    | 0.79    | 1.52 (0.66 - 3.50)      | 0.33    |
| Peripheral vascular disease                   | 0.70 (0.40 - 1.24)  | 0.22    | 0.70 (0.38 - 1.30)    | 0.26    | 0.77 (0.27 - 2.20)      | 0.63    |
| Acute kidney injury (dialysis-dependent)      | 1.09 (0.67 - 1.78)  | 0.73    | 1.05 (0.62 - 1.79)    | 0.84    | 1.20 (0.49 - 2.91)      | 0.69    |
| Hepatic failure                               | 8.56 (3.15 - 23.30) | <0.0001 | 6.25 (2.62 - 15.0)    | <0.0001 | 6.38 (1.49 - 27.35)     | 0.013   |
| Prolonged ventilation >21 d                   | 3.76 (2.18 - 6.48)  | <0.0001 | 4.34 (2.53 - 7.49)    | <0.0001 | 1.56 (0.45 - 5.39)      | 0.49    |
| Operative intervention                        | 0.76 (0.55 - 1.05)  | 0.096   | 0.86 (0.61 - 1.21)    | 0.37    | 0.57 (0.30 - 1.09)      | 0.089   |
| Cerebrovascular disease                       | 1.75 (1.21 - 2.54)  | 0.0033  | 1.42 (0.95 - 2.12)    | 0.086   | 2.44 (1.32 - 4.51)      | 0.0046  |
| Dementia                                      | 2.10 (1.20 - 3.67)  | 0.0091  | 2.18 (1.23 - 3.86)    | 0.0077  | 1.49 (0.50 - 4.39)      | 0.47    |
| COPD                                          | 1.51 (0.95 - 2.40)  | 0.079   | 1.05 (0.63 - 1.77)    | 0.84    | 2.80 (1.40 - 5.59)      | 0.0037  |
| Connective tissue disease                     | 1.00 (0.43 - 2.32)  | 0.99    | 0.74 (0.28 - 2.0)     | 0.56    | 1.73 (0.50 - 6.06)      | 0.39    |
| Peptic ulcer disease                          | 1.34 (0.67 - 2.70)  | 0.41    | 0.64 (0.26 - 1.57)    | 0.33    | 3.53 (1.44 - 8.63)      | 0.0057  |
| Liver disease                                 | 0.90 (0.63 - 1.30)  | 0.58    | 0.84 (0.56 - 1.25)    | 0.38    | 1.11 (0.58 - 2.11)      | 0.75    |
| Hepatitis B/C infection                       | 0.43 (0.20 - 0.94)  | 0.034   | 0.44 (0.18 - 1.04)    | 0.060   | 0.49 (0.12 - 2.09)      | 0.34    |
| Diabetes                                      | 0.85 (0.62 - 1.18)  | 0.33    | 0.88 (0.62 - 1.24)    | 0.46    | 0.83 (0.45 - 1.52)      | 0.54    |
| Pre-existing renal disease                    | 0.94 (0.66 - 1.34)  | 0.73    | 0.92 (0.62 - 1.36)    | 0.67    | 1.04 (0.54 - 2.02)      | 0.90    |
| Solid malignancy                              | 2.43 (1.73 - 3.41)  | <0.0001 | 2.03 (1.42 - 2.90)    | 0.0001  | 2.98 (1.67 - 5.32)      | 0.0002  |
| Hematogenous malignancy (leukemia / lymphoma) | 2.08 (0.87 - 4.95)  | 0.098   | 1.97 (0.81 - 4.82)    | 0.14    | 2.07 (0.44 - 9.68)      | 0.35    |
| Cirrhosis                                     | 1.31 (0.62 - 2.80)  | 0.48    | 1.36 (0.62 - 3.02)    | 0.44    | 1.08 (0.24 - 4.73)      | 0.92    |
| Metastatic cancer                             | 4.02 (2.48 - 6.50)  | <0.0001 | 2.93 (1.82 - 4.72)    | <0.0001 | 5.38 (2.57 - 11.26)     | <0.0001 |
| AIDS                                          | 0.24 (0.056 - 1.06) | 0.060   | 0.16 (0.02 - 1.22)    | 0.077   | 0.56 (0.07 - 4.26)      | 0.57    |

Appendix to: Anantha RV, Jegatheswaran J, Pepe DL, Priestap F, Delpont J, Mansour Haeryfar SM, McCormick JK, Mele T. Risk factors for mortality among patients with *Staphylococcus aureus* bacteremia: a single-centre retrospective cohort study.

CMAJ Open 2014. DOI: 10.9778/cmajo.20140018. Copyright © 2014 The Author(s) or their employer(s).

To receive this resource in an accessible format, please contact us at [cmajgroup@cmaj.ca](mailto:cmajgroup@cmaj.ca).

Supplementary Table 2: Multivariable analyses of risk factors contributing to all-cause, in-hospital, and 90-day postdischarge mortality among 925 patients with *Staphylococcus aureus* bacteremia between 2008 and 2012

| Variable                             | All-cause Mortality <sup>1</sup> |         | In-hospital Mortality <sup>1</sup> |         | Post-discharge Mortality <sup>1</sup> |         |
|--------------------------------------|----------------------------------|---------|------------------------------------|---------|---------------------------------------|---------|
|                                      | OR (95% CI)                      | P value | OR (95% CI)                        | P value | OR (95% CI)                           | P value |
| Age (decades)                        | 1.46 (1.33 - 1.60)               | <0.0001 | 1.58 (1.42 - 1.77)                 | <0.0001 | -                                     | -       |
| Methicillin resistance               | 1.70 (1.23 - 2.34)               | 0.0014  | -                                  | -       | 2.13 (1.22 - 3.70)                    | 0.0075  |
| Sepsis                               | 1.61 (1.12 - 2.32)               | 0.01    | 1.68 (1.13 - 2.49)                 | 0.011   | -                                     | -       |
| Admission to the intensive care unit | 5.18 (3.57 - 7.50)               | <0.0001 | 4.88 (3.27 - 7.27)                 | <0.0001 | -                                     | -       |
| Hepatic failure                      | 9.87 (3.24 - 30.13)              | <0.0001 | 6.53 (2.37 - 18.0)                 | 0.0003  | 10.81 (2.41 - 48.62)                  | 0.0019  |
| Prolonged ventilation >21 d          | -                                | -       | 2.00 (1.06 - 3.78)                 | 0.033   | -                                     | -       |
| Operative intervention               | 0.57 (0.39 - 0.84)               | 0.0039  | -                                  | -       | -                                     | -       |
| Cerebrovascular disease              | -                                | -       | -                                  | -       | 2.55 (1.32 - 4.92)                    | 0.0052  |
| COPD                                 | -                                | -       | -                                  | -       | 2.29 (1.10 - 4.76)                    | 0.0265  |
| Metastatic cancer                    | 4.83 (2.80 - 8.34)               | <0.0001 | 3.37 (1.95 - 5.81)                 | <0.0001 | 6.67 (3.06 - 14.5)                    | <0.0001 |

<sup>1</sup>Variables that were significant in the univariable analyses for each outcome and clinically significant variables were independently analyzed by logistic regression.
